# Supplementary material
Source: PubMed Central journal article supplement (PMC2958793)
Supplement: supp_mcq178_mcq178supp_table.pdf [file supp_mcq178_mcq178supp_table.pdf]

## SUPPLEMENTARY DATA

TABLE S1. Leaf dry matter content ( $\text{mg g}^{-1}$ ) for each species for the four datasets and the control, and correlations between datasets.

|                                          | Field measurements |               |               |               | Common garden <sup>†</sup> |
|------------------------------------------|--------------------|---------------|---------------|---------------|----------------------------|
|                                          | Ercé               | Aubrac        | Cantal        | Margeride     | Auzeville database         |
| Species found at all the four sites      |                    |               |               |               |                            |
| <i>Agrostis capillaris</i> L.            | 264                | 270           | 274           | 292           | 242                        |
| <i>Anthoxanthum odoratum</i> L.          | 222                | 228           | 241           | 270           | 223                        |
| <i>Dactylis glomerata</i> L.             | 265                | 240           | 268           | 261           | 225                        |
| <i>Festuca rubra</i> L.                  | 296                | 297           | 296           | 333           | 245                        |
| <i>Holcus lanatus</i> L.                 | 223                | 234           | 222           | 257           | 198                        |
| <i>Lolium perenne</i> L.                 | 237                | 234           | 238           | 246           | 196                        |
| <i>Phleum pratense</i> L.                | 232                | 252           | 263           | 289           | 245                        |
| <i>Poa trivialis</i> L.                  | 244                | 223           | 242           | 272           | 220                        |
| <i>Trisetum flavescens</i> (L.) Beauv    | 263                | 259           | 278           | 289           | 241                        |
| Mean                                     | 250                | 249           | 258           | 279           | 226                        |
| Correlation with Auzeville database      | 0.59 <sup>+</sup>  | 0.70*         | 0.86**        | 0.83**        |                            |
| Species found at 1–3 of the sites        |                    |               |               |               |                            |
| <i>Agropyron repens</i> L.               |                    | 217           |               | 272           | 263 <sup>‡</sup>           |
| <i>Agrostis stolonifera</i> L.           | 266                |               | 264           |               | 247 <sup>‡</sup>           |
| <i>Alopecurus sp.</i> L.                 |                    |               |               | 265           | 218 <sup>‡</sup>           |
| <i>Arrhenatherum elatius</i> (L.) Beauv. | 247                |               |               |               | 218                        |
| <i>Avenula marginata</i> L.              | 293                |               |               |               | 263                        |
| <i>Avenula pubescens</i> (Huds.) Dumort  |                    |               |               | 253           | 250                        |
| <i>Briza media</i> L.                    | 254                |               |               |               | 274                        |
| <i>Cynosurus cristatus</i> L.            |                    |               | 313           | 297           | 262                        |
| <i>Danthonia decumbens</i> L.            | 326                | 279           |               | 308           | 351                        |
| <i>Festuca arundinacea</i> Schreb.       | 208                | 254           |               | 256           | 221                        |
| <i>Festuca pratensis</i> L.              | 247                |               |               |               | 244 <sup>‡</sup>           |
| <i>Holcus mollis</i> L.                  |                    |               |               | 261           | 259 <sup>‡</sup>           |
| <i>Lolium multiflorum</i> L.             | 228                |               |               |               | 196                        |
| <i>Molinia coerulea</i> L.               | 344                |               |               |               | 301                        |
| <i>Poa pratensis</i> L.                  |                    | 264           | 261           | 269           | 220                        |
| Number of species found per site         | 89                 | 50            | 45            | 51            |                            |
| Grass species (%: mean $\pm$ s.e.)       | 57 $\pm$ 0.16      | 76 $\pm$ 0.08 | 84 $\pm$ 0.08 | 80 $\pm$ 0.15 |                            |

<sup>†</sup> From Al Haj Khaled, 2005; no limitation of nutrient and water for plant growth.

\*\*\*  $P < 0.001$ ; \*\*  $P < 0.01$ ; \*  $P < 0.05$ ; +  $P < 0.1$

<sup>‡</sup> Data recorded from a separate experiment (P. Cruz, unpublished data).

TABLE S2. Standing herbage mass and rate of herbage utilization for the different treatments in dataset 1.

| Treatments and effects \$   | Plant nutrient index | Ellenberg -N.w | Date of the first harvest (Julian days) | LDMCw.meas (g m <sup>-2</sup> ) | Standing herbage mass (t DM ha <sup>-1</sup> ) |     |      |                |     |      |                      |    |     |
|-----------------------------|----------------------|----------------|-----------------------------------------|---------------------------------|------------------------------------------------|-----|------|----------------|-----|------|----------------------|----|-----|
|                             |                      |                |                                         |                                 | Growth cycle 1                                 |     |      | Growth cycle 2 |     |      | Growth cycles effect |    |     |
|                             |                      |                |                                         |                                 | Be                                             | Af  | RHU  | Be             | Af  | RHU  | Be                   | Af | RHU |
| M+                          | 0.74                 | 5.8            | 173                                     | 224                             | 6.3                                            | 0.8 | 0.87 | 2.3            | 0.4 | 0.83 | ***                  | ns | *** |
| M-                          | 0.61                 | 5.7            | 176                                     | 232                             | 5                                              | 0.8 | 0.84 | 3.0            | 0.8 | 0.73 | **                   | ns | **  |
| GM+                         | 0.73                 | 5.1            | 106                                     | 261                             | 2.6                                            | 1.3 | 0.50 | 4.2            | 1.0 | 0.76 | ***                  | ns | *** |
| GM-                         | 0.61                 | 4.2            | 109                                     | 262                             | 2.1                                            | 0.8 | 0.62 | 4.3            | 1.1 | 0.74 | ***                  | ns | *** |
| P+                          | 0.83                 | 6.7            | 132                                     | 249                             | 3.1                                            | 1.2 | 0.61 | 4              | 2.3 | 0.43 | *                    | *  | ns  |
| P-                          | 0.53                 | 5.9            | 132                                     | 292                             | 1.8                                            | 0.6 | 0.67 | 2.6            | 1.4 | 0.46 | *                    | *  | ns  |
| Defoliation regime effect † | *                    | *              | ***                                     | ***                             | ***                                            | ns  | ***  | ***            | ns  | **   |                      |    |     |
| Fertility effect ‡          | ***                  | ns             | ns                                      | *                               | *                                              | ns  | ns   | *              | ns  | ns   |                      |    |     |

ANOVA for treatments (lines) or growth cycle effects (last columns) on standing herbage mass before and after defoliation (dataset 1).

Be: before defoliation; Af: after defoliation; rate of herbage utilization (RHU) = (Be – Af)/Be.

\$ 3 replications per treatment.

†: comparison of M, GM and P.

‡: comparison of X+ and X-.

\*\*\*:  $P < 0.001$ ; \*\*:  $P < 0.01$ ; \*:  $P < 0.05$ .

The meadows were cut last (around 175 Julian days), and in spring the pastures were grazed later than when the meadows were grazed. There were significant effects of defoliation regime ( $P < 0.05$ ) and of fertility ( $P < 0.001$ ) on herbage mass before harvest, and of defoliation regime on the difference in herbage mass before and after harvest and on the rate of herbage utilization. For the first growth, the reproductive phase occurred only on meadows, which had twice the amount of standing herbage mass as the meadows grazed in spring and pastures. On the other hand, the maximum standing herbage mass was observed for the second growth cycle on meadows grazed in spring and pastures. Differences between standing herbage mass before and after defoliation were greatest during the first growth cycle for the meadows and during the second one for the meadows grazed in spring. The pastures had the highest residual herbage mass in the second growth cycle.
